# Supplementary material for: Antimicrobial Activity of Novel Ni(II) and Zn(II) Complexes with (E)-2-((5-Bromothiazol-2-yl)imino)methyl)phenol Ligand: Synthesis, Characterization and Molecular Docking Studies
Source: MDPI journal article supplement (doi:10.3390/antibiotics12111634), 2023-11-17
Supplement: s1 [file s1]

## **Supplementary Data**

# **Antimicrobial Activity of Novel Ni(II) and Zn(II) Complexes with (E)-2-((5-Bromothiazol-2-yl)imino)methyl)phenol ligand: Synthesis, Characterization and Molecular Docking Studies**

Inas Al-Qadisy <sup>1</sup>, Waseem Sharaf Saeed,<sup>2</sup> Ahmad Abdulaziz Al-Owais <sup>3</sup>, Abdelhabib Semlali,<sup>4</sup> Ali Alrabie <sup>1</sup>, Lena Ahmed Saleh Al-Faqeeh,<sup>5</sup> Mohammed ALSaeedy <sup>1</sup>, Arwa Al-Adhrai <sup>1</sup> Abdel-Basit Al-Odayni <sup>2</sup> and Mazahar Farooqui <sup>1,\*</sup>

<sup>1</sup> Chemistry Department, Maulana Azad College of Arts, Science and Commerce, Aurangabad 431001, India

<sup>2</sup> Department of Restorative Dental Sciences, College of Dentistry, King Saud University, P.O. Box 60169, Riyadh 11545, Saudi Arabia

<sup>3</sup> Chemistry Department, College of Science, King Saud University, P.O. Box 2455, Riyadh 11451, Saudi Arabia

<sup>4</sup> Groupe de Recherche en Écologie Buccale, Faculté de Médecin Dentaire, Université Laval, Quebec, QC G1V 0A6, Canada

<sup>5</sup> Microbiology Department, Dr. Babasaheb Ambedkar Marathwada University, Aurangabad 431004, India

\* Correspondence: [inas2015228@gmail.com](mailto:inas2015228@gmail.com) [mazaharf@maca.ac.in](mailto:mazaharf@maca.ac.in)

## NMR spectra:

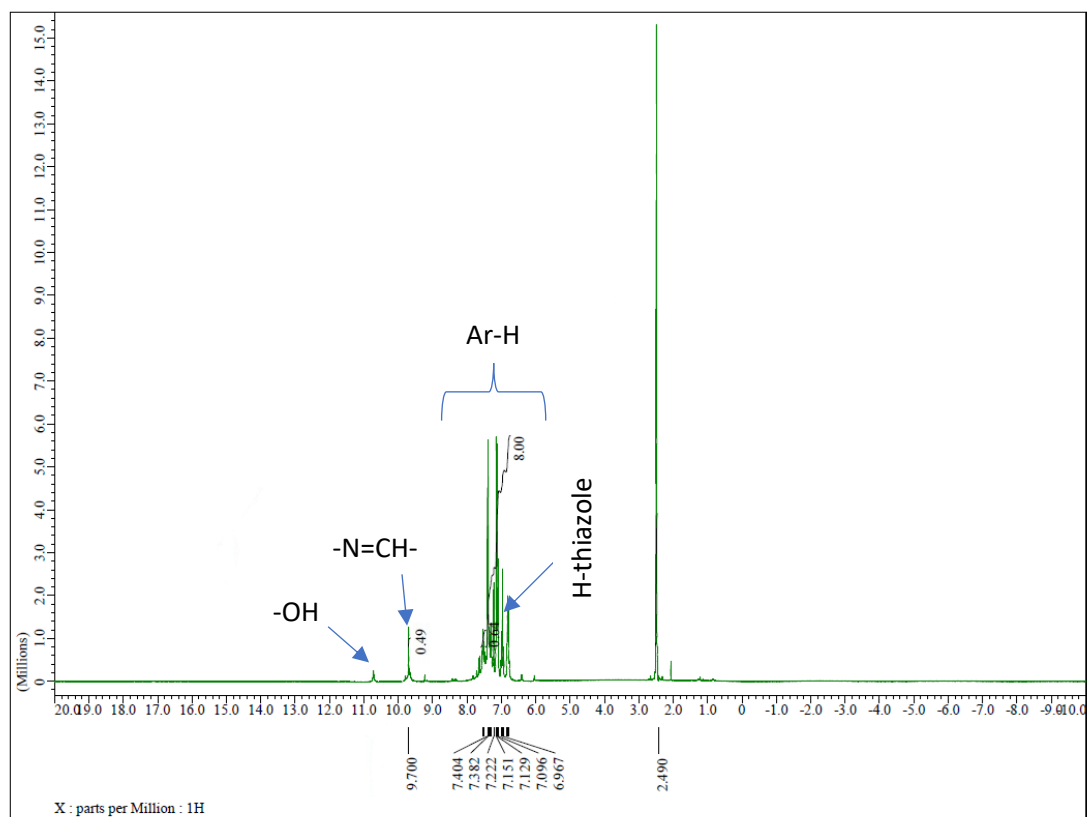

**Figure S1.**  $^1\text{H}$  NMR spectrum of (E)-2-(((5-bromothiazol-2-yl)imino)methyl)phenol ligand in  $\text{DMSO-d}_6$

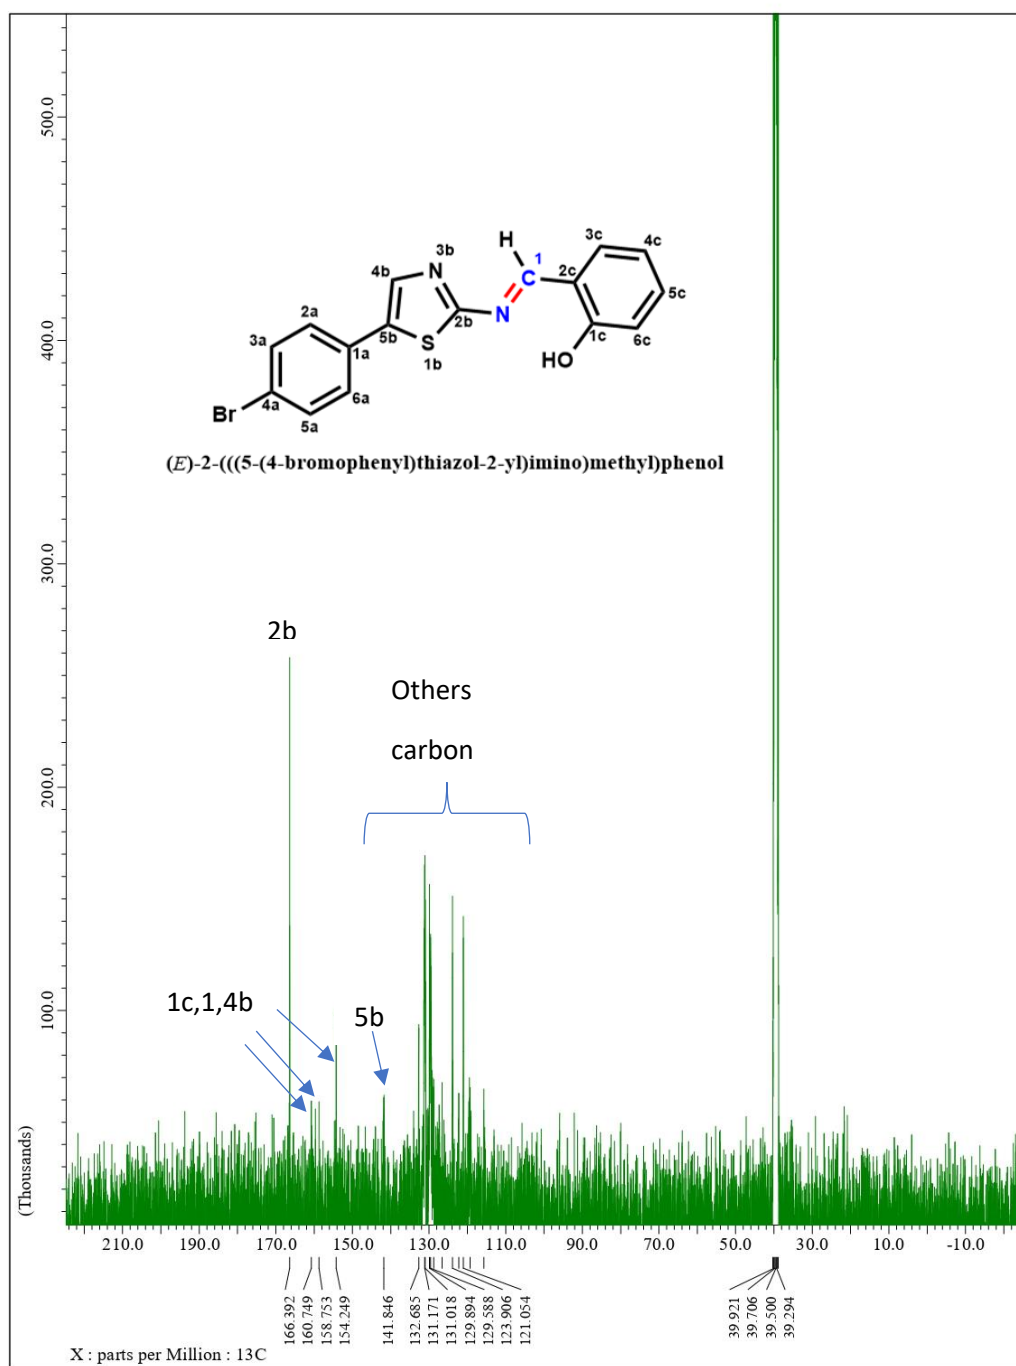

**Figure S2.**  $^{13}\text{C}$  NMR spectrum of *(E)*-2-(((5-bromothiazol-2-yl)imino)methyl)phenol ligand in DMSO- $d_6$
